# Supplementary material
Source: Springer Nature journal article supplement (https://www.springermedizin.de/resource/supplementary/12888_2010_715_MOESM2_ESM.pdf/9478260)

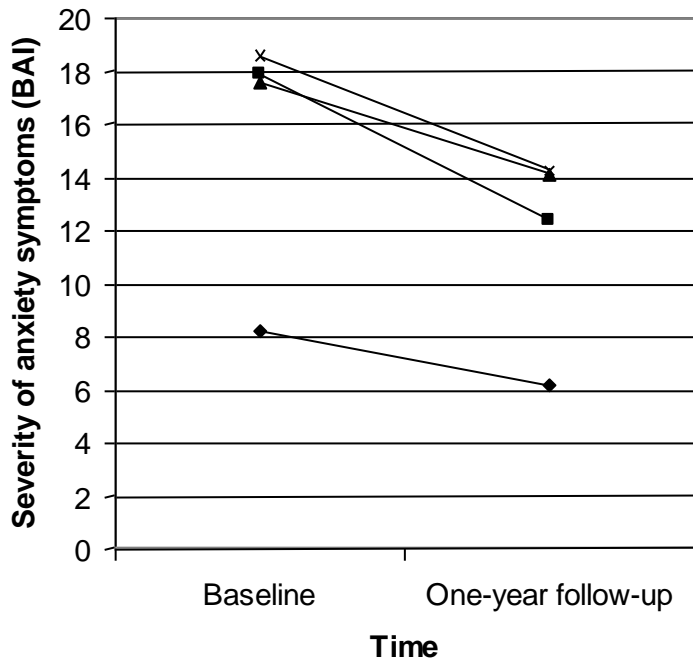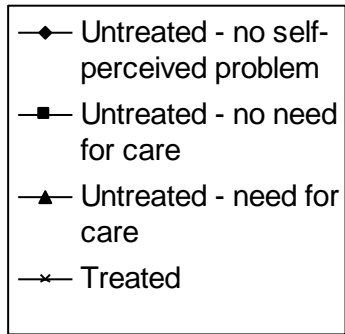

Supplement: MOESM2 [file 9478260]
